# Supplementary material for: DNA methylation differences of the BPI promoter among pig breeds and the regulation of gene expression
Source: Royal Society of Chemistry journal article supplement (doi:10.1039/c7ra05549h), 2017-01-01
Supplement: c7ra05549h1.pdf [file c7ra05549h1.pdf]

## **DNA methylation differences of the *BPI* promoter among pig breeds and the regulation of gene expression**

HaiFei Wang<sup>a</sup>, JaYun Wu<sup>a</sup>, Sen Wu<sup>a</sup>, ShengLong Wu<sup>ab</sup>, WenBin Bao<sup>ab\*</sup>

*<sup>a</sup>Key Laboratory for Animal Genetics, Breeding, Reproduction and Molecular Design of Jiangsu Province, College of Animal Science and Technology, Yangzhou University, Yangzhou 225009, China*

*<sup>b</sup>Joint International Research Laboratory of Agriculture & Agri-Product Safety, Yangzhou University, Jiangsu Yangzhou 225009, China*

*\*Corresponding author, e-mail: wbbao@yzu.edu.cn*

**Supplementary Table S1** Sequences of primer used in PCR assays.

| Primer                       | Sequence (5' - 3')                                                     | Length (bp) |
|------------------------------|------------------------------------------------------------------------|-------------|
| <i>BPI</i> Normal PCR primer | F: TTTCTGCTGTGCCATGACG<br>R: CCCCTCACCCCATCTTGTT                       | 489         |
| <i>BPI</i> BSP PCR primer    | F: TTTTTGTTTTTTTTGTTTTTTTT<br>R: ATTTAATCCCTAACCTTACTCAATAC<br>F:      | 195         |
| <i>BPI</i> BSP PCR primer    | TGAGGTATAGTAAAAATAAATTAAAGTAAA<br>R: AATTATAAAAATAATTACCACAACCTAAACTA  | 432         |
| <i>BPI</i> BSP PCR primer    | F: TATTGAGTAAGGTTAGGGATTAAATTTATA<br>R: TAAATACCTCAAAATTCATTATATTTTTCT | 366         |
| <i>BPI</i> RT-PCR primer     | F: ATATCGAATCTGCGCTCCGA<br>R: TTGATGCCAACCATTCTGTCC                    | 136         |
| <i>GAPDH</i> RT-PCR primer   | F: ACATCATCCCTGCTTCTACTGG<br>R: CTCGGACGCCTGCTTCAC                     | 187         |

## Supplementary Figures

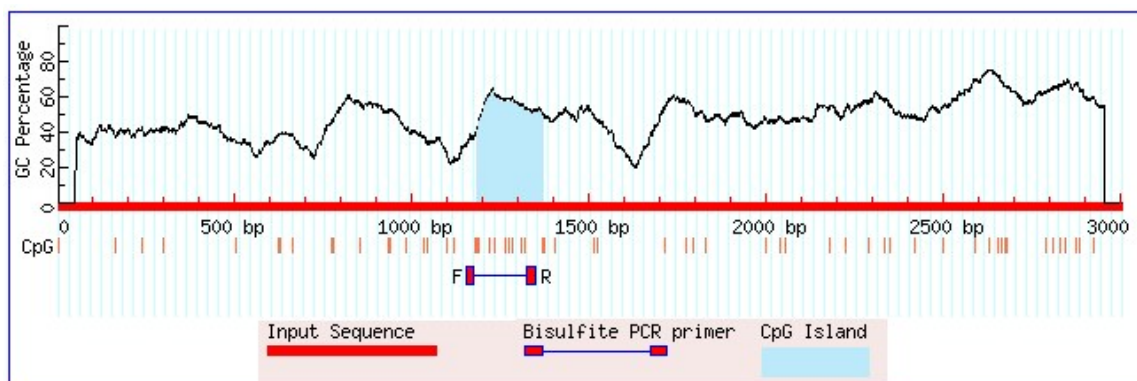

**Supplementary Figure S1.** CpG island prediction in the promoter of the pig *BPI* gene.

```

tttttgccttttgccttttcttgagccgccccgcggcatatggaggttcccaggctagg
      ==Elk-1==          1 2 3
                        =====AP-2=====
agtctaatacggagctgtagctgccggcctacaccacagccacagcaactcgggaccaag
      4 5 6
                        =====NF-1=====
ccacgtttgcgacctacaccacagttcatggcaacgctggatccttaacgcactgagcaa
      7 8 9 10
                        =====Pax-3===== =R

ggtcagggatcaaac
AR-alpha=
  
```

**Supplementary Figure S2.** Transcription factor binding sites prediction in the CpG island within the *BPI* promoter.

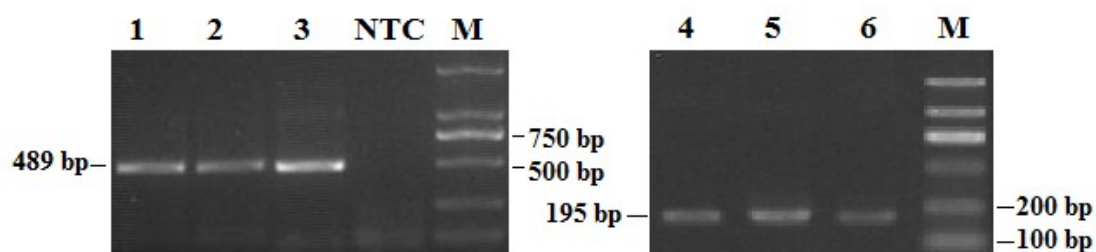

**Supplementary Figure S3.** Agarose gel electrophoresis (1%) of normal DNA and BSP DNA PCR products amplified from the duodenum of different pig breeds. 1-3: normal DNA

products; 4-6: BSP DNA products; M: DL2000 marker; NTC: no template control.

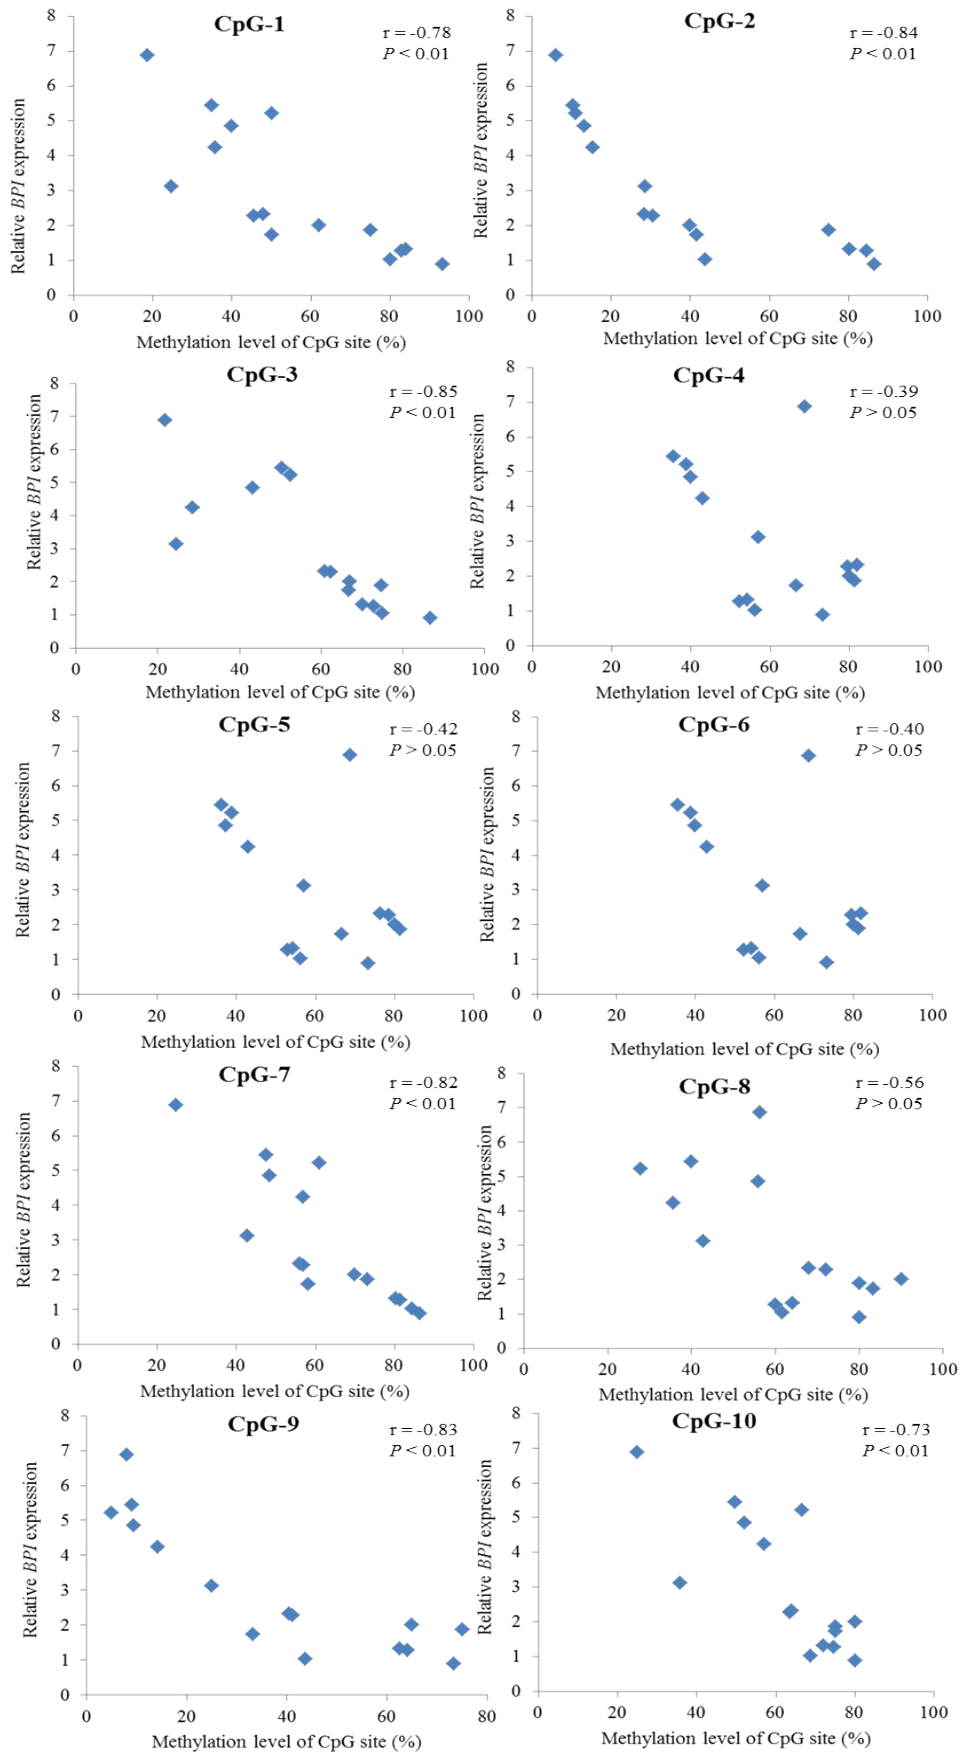

**Supplementary Figure S4.** Correlation analysis between relative *BPI* expression and methylation levels of the CpG sites.
